# Supplementary material for: Total syntheses of oxygenated brazanquinones via regioselective homologous anionic Fries rearrangement of benzylic O-carbamates
Source: Beilstein J Org Chem. 2006 Feb 21;2:1. doi: 10.1186/1860-5397-2-1 (PMC1408083; doi:10.1186/1860-5397-2-1)
Supplement: File 1 — contains the experimental section [file Beilstein_J_Org_Chem-02-01-s001.doc]

**Experimental**

**General information:** Melting points were determined using a Fisher hot stage apparatus and are uncorrected. 1H and 13C NMR spectra were obtained using a Bruker AC-200, AV-300 instrument in CDCl3 or DMSO solutions.Chemical shifts () are given in parts per million (ppm) downfield relative to tetramethylsilane (TMS, TMS=0) and coupling constants (*J*) in Hz. When peak multiplicities are given, the following abbreviations are used: s (singlet), d (doublet), t (triplet), q (quartet), dd (double doublet) and m (multiplet). 13C NMR spectra were usually obtained using the JMOD pulse sequence. Infrared spectra were obtained using a BOMEM MB-100, MB-120 or MB-Series FTIR spectrometer, usually as liquid films or as KBr discs. Low resolution mass spectra were obtained using either a Varian Saturn GC/MS or VG 70 mass spectrometer. High resolution mass spectral analyses were performed by Universities of Ottawa or University of Toronto mass spectrometry facilities. TLC was carried out using percolated sheets (silica 60). Flash chromatography was carried out using silica gel 60 F according to Still and colleagues.27 Temperatures given generally refer to cooling bath temperatures and are as follows: -78o C (acetone/dry ice), 0o C (ice/water).

Tetrahydrofuran (THF) was freshly distilled from sodium benzophenone ketyl before use Diisopropylamine was freshly distilled from CaH2 before use. *N*,*N*-Diethylcarbamoyl chloride was distilled from CaH2 and stored under argon. Acetone was dried over K2CO3 and distilled.

Solutions of nBuLi and SBuLi were purchased from Aldrich Chemical Company as solutions in hexanes and cyclohexane, respectively, and regularly titrated against a standard solution of Sbutanol with 1,10-phenanthroline as indicator.28

**(2-bromo-phenyl)-(7-methoxy-benzofuran-2-yl)-methanone** (**5a**)**; General procedure.** A solution of 2-methoxy-*ortho*-hydroxybenzaldehyde **7a** (0.15 g, 1.0 mL, 1.0 mmol) in 10 mL of dry acetone was added to a stirred suspension containing K2CO3 (0.14g, 1.0 mmol) in 10 mL of dry acetone. This mixture was stirred at room temperature for 15 min, and bromoacetophenone **6** (0.2 mg, 1.0 mmol) in 10 mL of acetone was added. The resulting mixture was stirred under reflux for 4 h and then treated with brine. The aqueous layer was extracted with EtOAc (3 x 10 mL). The organic layers were dried (Na2SO4) and concentrated. The product was purified by flash chromatography (5-10% ethyl acetate/hexane), to obtain the **(2-bromo-phenyl)-(7-methoxy-benzofuran-2-yl)-methanone 5a:** (0.34 g, 95%); salmon oil; IR *v*max/cm-1 1660 (C=O) (KBr); 1H NMR (CDCl3,200MHz,) **H7.5 (d, *J* 10.0 Hz, 1H), 7.7–7.4 (m, 7H), 3.8 (s, 3H, OC**H3**); 13C NMR (CDCl3,50 MHz) **C184.8 (**C**O), 145.1, 139.2, 133.6, 131.9, 129.5, 127.3, 124.9, 121.6, 118.0, 115.3, 110.4, 56.2 (O**C**H3); HRMS (M+) Found: 329.9894. Calc. for C16H11O3Br: 329.9892.

**(2-bromo-phenyl)-(6-methoxy-benzofuran-2-yl)-methanone** (**5b**)**:** From **7b** (0.15 g, 1.0 mmol); yield: (0.34 g, 96%); yellow solid, m.p. 82o C (ethylacetate/dichloromethane); IR *v*max/cm-1 1665 (C=O) (KBr); 1H NMR (CDCl3, 200MHz) **H7.7–7.4 (m, 5H), 7.2 (s, 1H), 7.1 (s, 1H), 6.9 (dd, *J* 6.0 and 3.0 Hz, 1H), 3.9 (s, 3H, OC**H3**); 13C NMR (CDCl3, 50 MHz,) 183.9 (**C**O), 161.8, 158.3, 151.4, 139.7, 133.6, 131.8, 129.3, 127.2, 124.0, 120.5, 120.1, 118.9, 114.9, 95.7, 55.9 (O**C**H3); HRMS (M+) Found: 329.9889. Calc. for C16H11O3Br: 329.9892.

**(2-bromo-phenyl)-(5-methoxy-benzofuran-2-yl)-methanone** (**5c**)**:**  From **7c** (0.15 g, 1.0 mmol); yield: (0.34 g, 95%); orange solid, m.p. 76o C (ethylacetate/dichloromethane) IR *v*max/cm-1 1660 (C=O) (KBr); 1H NMR (CDCl3, 300MHz) **7.7 (dd, *J* 2.7 and 12.0 Hz, 1H), 7.5–7.4 (m, 5H), 7.1 (m, 2H), 3.8 (s, 3H, OC**H3**); 13C NMR (CDCl3, 50 MHz,) **H184.8 (**C**=O), 157.1, 152.6, 152.0, 139.7, 133.9132.2, 129.7, 127.9, 127.6, 120.3, 119.7, 118.4, 113.7, 104.4, 56.2 (O**C**H3);  HRMS (M+) Found: 329.9861. Calc. for C16H11O3Br: 329.9892.

**(2-bromo-phenyl)-(4,6-dimethoxy-benzofuran-2-yl)-methanone** (**5d**)**:**  From **7d** (0.18 g, 1.0 mmol); yield: (0.38 g, 98%); yellow solid, m.p. 99-100o C (ethylacetate/dichlorometha-

ne); IR *v*max/cm-1 1652 (C=O) (KBr); 1H NMR (CDCl3, 200MHz) **H 7.7 (s, 1H), 7.5–7.4 (m, 3H), 7.2 (s,1H), 6.7 (s, 1H), 6.3 (s, 1H), 3.9 (s, 6H, OC**H3**); 13C NMR (CDCl3, 50 MHz) **C183.1 (**C**=O), 163.0, 159.8, 155.3, 150.0, 138.9, 133.5, 131.6, 129.3, 127.2, 120.0, 117.3, 112.0, 95.6, 88.2, 58.9 (O**C**H3); HRMS (M+) Found: 359.9958. Calcd. for C17H13O4Br: 359.9997.

**7-Methoxybenzofuran-2-yl(2-bromophenyl)carbinol** (**8a**)**; General Procedure.** An aqueous solution of NaOH 10%:NaBH4:H2O (0.5 mL: 0.03g-0.77 mmoles: 1.30 mL) , was added dropwise, to a stirred solution of (2-bromo-phenyl)-(7-methoxy-benzofuran-2-yl)-methanone **5a** (0.72 g, 1.98 mmoles) in 20 mL of MeOH at rt. After complete consumption of the starting material (TLC monitoring). Treated with water was added into the mixture. The aqueous layer was extracted with EtOAc (3 x 10 mL) and the combined organic layers washed successively with brine and dried (Na2SO4). The solvent was evaporated to obtain **7- Methoxybenzofuran-2-yl(2-bromophenyl)carbinol** (**8a**)**:** (0.71 g, 98%); colorless oil; IR *v*max/cm-1 3398 cm-1 (C-**OH**) (KBr); 1H NMR (Acetone d6,300MHz) **H 7.7 (d, *J* 1.2 Hz, 1H), 7.5 (d, *J* 1.2 Hz, 1H), 7.4 (m, 3H), 7.2–7.0 (m, 3H), 6.8 (d, *J* 3.0 Hz, 1H), 6.2 (s, 1H, C**H**OH), 3.9 (s, 3H, OC**H3**); 13C NMR (50 MHz, CDCl3) **C, 144.8, 139.7, 133.2, 130.1, 128.9, 128.2, 123.9, 123.2, 114.0, 107.0, 105.6, 69.7 (**C**HOH), 56.0 (O**CH3**); HRMS (M+) Found: 332.0024. Calc. for C16H13O3Br: 332.0048.

**6-Methoxybenzofuran-2-yl(2-bromophenyl)carbinol** (**8b**)From **5b** (0.70 g, 1.92 mmoles); yield: (0.65 g, 97%); colorless oil; IR *v*max/cm-1 3411 cm-1 (C-**OH**) (KBr); 1H NMR (CDCl3,200MHz) **H 7.7 (d, *J* 9.0 Hz, 1H), 7.6 (d, *J* 3.0 Hz, 1H), 7.4-7.2 (m, 3H), 6.9 (s, 1H), 6.6 (dd, *J* 3.0 and 9.0 Hz, 1H), 6.4 (s, 1H), 6.3 (d, *J* 6.0 Hz, 1H, C**H**OH), 3.8 (s, 3H, OC**H3**); 13C NMR (50 MHz, CDCl3) **C39.6, 133.0, 129.8, 128.7, 127.9, 122.9, 121.5, 121.4, 112.1, 104.9, 96.2, 94.8, 69.7 (**C**HOH), 55.9 (O**C**H3) HRMS (M+) Found: 332.0047. Calc. for C16H13O3Br: 332.0048.

**5-Methoxybenzofuran-2-yl(2-bromophenyl)carbinol** (**8c**)From **5c** (0.70 g, 1.92 mmoles); yield: (0.65 g, 98%); colorless oil; IR *v*max/cm-1 3406 cm-1 (C-**OH**) (KBr); 1H NMR (CDCl3,200MHz) **H 7.8 (d, *J* 12 Hz, 1H), 7.6 (dd, *J* 3.0 and 12.0 Hz, 1H), 7.4 (t, *J* 1.2 Hz, 1H), 7.2-7.0 (m, 2H), 6.9 (dd, *J* 3.0 and 12.0 Hz, 1H), 6.4 (s, 1H), 6.3 (s, 1H), 5.2 (s, 1H, C**H**OH), 3.8 (s, 3H, OC**H3**); 13C NMR (50 MHz, CDCl3) **C39.5, 132.9, 129.9, 128.7, 128.6, 127.9, 122.9, 119.5, 113.3, 111.9, 105.1, 103.9, 69.7 (**C**HOH), 56.1 (O**C**H3); HRMS (M+) Found: 331.9988. Calc. for C16H13O3Br: 332.0048.

**4,6-Methoxybenzofuran-2-yl(2-bromophenyl)carbinol** (**8d**)From **5d** (0.78 g, 1.61 mmoles); yield: (0.63 g, 96%); colorless oil; IR *v*max/cm-1 3410 cm-1 (C-**OH**) (KBr); 1H NMR (CDCl3,200MHz) **H 7.7 (m, 1H), 7.5 (d, *J* 1.2 Hz, 1H), 7.4 (t, *J* 9.0 Hz, 1H), 7.2 (m, 2H), 6.6 (s, 1H), 6.4 (s, 1H), 6.3 (s, 2H), 3.8 (s, 6H, OC**H3**); 13C NMR (50 MHz, CDCl3) **C139.6, 132.8, 129.7, 128.6, 127.8, 122.6, 102.5, 94.4, 88.4, 69.5 (**C**HOH), 55.9 (O**C**H3), 55.6 (O**C**H3); HRMS (M+) Found: 362.0131. Calc. for C17H15O4Br: 362.0154.

**-(2-bromophenyl)-7-methoxybenzofuran-2-ylmethyl-*N-N-*diethylcarbamate** (**2a**)**;**

**General procedure.** To a suspension of NaH 60% (6.22 mmoles, 0.245 g) in 10 mL of THF, at 0o C, 7-Methoxybenzofuran-2-yl(2-bromophenyl)carbinol, **8a** (6.22 mmoles, 2.27 g) in 50mL of THF was added dropwise. The mixture was stirred at room temperature for 2h under argon atmosphere, and *N,N*-diethylcarbamoyl chloride (3.9 mL, 6.84 mmoles) was added. The reaction was stirred for 1 h and the resulting mixture was acidified with 10 mL of HCl 5%, and extracted with EtOAc (3 x 5 mL). The combined organic layers were washed with brine and dried (Na2SO4). The solvent was evaporated to obtain -**(2-bromophenyl)-7-methoxybenzofuran-2-ylmethyl-*N-N*-diethylcarbamate 2a:** (2.80 g, 97%); orange solid, m.p.116–117o C (ethylacetate/hexanes); IR *v*max/cm-1 1706 cm-1 (C=O) (KBr); 1H NMR (CDCl3,300MHz) **H 7.5 (dd, *J* 6.0 and 9.0 Hz, 1H), 7.4–7.0 (m, 5H), 6.9 (s, 1H, C**H**OH), 6.8 (d, *J* 3.0 Hz, 1H), 6.4 (s, 1H), 3.8 (s, 3H, OC**H3**), 3.3–4.0 (m, 4H, N(C**H2**)2R), 1.0 (m, 6H, NR(C**H3**)2); 13C NMR (50 MHz, CDCl3) **C156.6, 154.9 (**C**=O), 145.7, 137.9, 133.4, 130.1, 128.9, 128.0, 123.9, 123.4, 113.9, 107.6, 107.3, 71.4 (**C**HOH), 56.6 (O**C**H3), 42.5 (N(CH2)2R), 41.8 (N(**C**H2)2R), 13.2 (NR(**C**H3)2); HRMS (M+) Found: 431.0735. Calc. for C21H22NO4Br: 431.0732 .

-**(2-bromophenyl)-6-methoxybenzofuran-2-ylmethyl-*N-N*-diethylcarbamate 2b:** From **8b** (2.22g, 6.08 mmoles,); yield: (2.71 g, 96%); orange solid, m.p. 112–113o C (ethylacetate/hexanes); IR *v*max/cm-1 1700 cm-1 (C=O) (KBr); 1H NMR (CDCl3,300MHz) **H7.6 (t, *J* 3.0 Hz, 2H), 7.5–7.4 (m, 3H), 7.2 (s, 1H), 6.8 (d, *J* 3.0 Hz, 2H), 6.5 (s, 1H), 3.9 (s, 3H, OC**H3**), 3.3–3.0 (m, 4H, N(C**H2**)2R), 1.0 (m, 6H, NR(C**H3**)2); 13C NMR (50 MHz, CDCl3) **c158.6, 156.7 (**C**=O), 153.7, 137.8, 133.4, 130.0, 128.9, 125.9, 123.2, 121.8, 121.5, 112.4, 106.7, 104.4, 104.0, 96.4, 71.3 (**C**HOH), 56.3 (O**C**H3), 42.1 (N(**C**H2)2R), 41.8 (N(**C**H2)2R), 14.6 (NR(**C**H3)2, 14.2 (NR(**C**H3)2; HRMS (M+) Found: 431.0739. Calc. for C21H22NO4Br: 431.0732.

-**(2-bromophenyl)-5-methoxybenzofuran-2-ylmethyl-*N-N*-diethylcarbamate 2c**:From **8c** (2.27g, 6.22 mmoles); yield: 2.83 g (98%); orange solid, m.p. 116o C (ethylacetate/hexanes); IR *v*max/cm-1 1706 cm-1(C=O) (KBr); 1H NMR (CDCl3,300MHz) **H7.6 (dd, *J* 9.0 and 15.0 Hz, 1H), 7.6 (s, 1H), 7.4 (t, *J* 9.0 Hz, 1H), 7.3–7.0 (m, 4H), 6.8 (m, 2H), 4.0 (s, 3H, OC**H3**), 3.3 (m, 4H, N(C**H2**)2R), 1.6-1.0 (m, 6H, NR(C**H3**)2); 13C NMR (50 MHz, CDCl3) **C154.9 (**C**=O), 145.8, 137.9, 133.4, 130.1, 128.9, 128.0, 123.9, 123.4, 113.9, 107.5, 107.3, 71.3 (**C**HOH), 56.6 (O**C**H3), 42.8 (N(**C**H2)2R), 13.1 (NR(**C**H3)2; HRMS (M+) Found: 431.0723. Calc. for C21H22NO4Br: 431.0732.

-**(2-bromophenyl)-4,6-dimethoxybenzofuran-2-y-methyl-*N-N*-diethylcarbamate** **2d:** From **8d** (2.46 g, 6.22 mmoles); yield: (2.46 g, 80%); colorless oil; IR *v*max/cm-1 (KBr): 1700 cm-1(C=O); 1H NMR (CDCl3,300MHz) **H7.6 (dd, *J* 12.0 and 9.0 Hz, 2H), 7.3 (m, 2H), 7.2 (m, 2H), 6.7 (s, 1H, C**H**OH), 6.5 (s, 1H), 3.8 (s, 6H, OC**H3**), 3.4 (s, 4H, N(C**H2**)2R), 1.0 (s, 6H, NR(C**H3**)2); 13C NMR (50 MHz, CDCl3) **C154.0 (**C**=O), 152.3, 137.9, 133.4, 129.9, 128.8, 127.9, 104.3, 94.6, 88.7, 71.3 (**C**HOH), 56.1 (O**C**H3), 42.5 (N(**C**H2)2R), 41.8 (NR(CH3)2, 14.7 (NR(**C**H3)2, 13.8 (NR(**C**H3)2; HRMS (M+) Found: 461.0842. Calc. for C22H24NO5Br: 461.0838.

**8-Methoxy-Benzo[B]naphtho[2,3-d]furan-6,11-dione.** (**1a**)**; General procedure;** A solution of SBuLi (22.4 mmoles, 9.7 mL of 2.3 M solution in hexane) was added to a cold (-78 oC) solution containing -(2-bromophenyl)-5-methoxybenzofuran-2-yl-methyl-*N-N*-diethylcarbamate **2a** (2.6 g, 5.6 mmoles) in 20 mL of THF. The resultant mixture was stirred for 1 h at 78 oC and allowed to warm to room temperature over 2 h.

A solution of 30 mL of NH4Cl 10% was added, and the resulting mixture extracted with EtOAc (3 x 15 mL). The combined organic layers were washed successively with brine and dried (Na2SO4). The product was purified by flash chromatography (30-60% ethyl acetate/hexane) to **8-Methoxy-Benzo[B]naphtho[2,3-d]furan-6,11-dione 1a: (**0.85 g, 54%);orange solid, m.p. 173o C (ethylacetate/chloroform); IR *v*max/cm-1 1679, 1621 cm-1(C=O) (KBr); 1H NMR (CDCl3,300MHz) **H 8.2 (m, 2H, H1 and H4), 7.9 (d, 2H, *J* 6.0 H*z,* 1H, H7)7.8 (m, 2H, H2 and H3), 7.4 (t, *J* 9.0 Hz, 1H, H6), 7.0 (t, *J* 9.0 Hz, 1H, H5), 3.8 (s, 3H, OC**H3**); 13C NMR (50 MHz, CDCl3) **C143.0137.0, 136.2, 136.0, 132.0, 128.0, 127.2, 121.2, 119.0 115.2, 114.0, 104.4, 99.2, 96.0, 56.4 (O**C**H3); HRMS (M+) Found: 278.0606. Calc. for C17H10O4: 278.0579.

**7-Methoxy-Benzo[B]naphtho[2,3-d]furan-6,11-dione.** **1b:** From **2b** (2.60 g, 5.6 mmoles); yield: (0.87 g, 56%);orange solid, m.p. 170o C (ethylacetate/chloroform); IR *v*max/cm-1 1680, 1623 cm-1(C=O) (KBr); 1H NMR (CDCl3,300MHz) **H8.3 (m, 2H, H1 and H4), 8 (m, 2H, H2 and H3), 7.7 (d, *J* 6.0 Hz, 1H, H6), 7.6 (s, 1H, H7), 7.5 (s, 1H, H5), 3.80(s, 3H, OC**H3**); 13C NMR (50 MHz, CDCl3) **C160.0 (**C**O), 134.5, 134.2, 127.3, 127.1, 120.6, 114.0, 104.9, 104.4, 58.4 (O**C**H3) HRMS (M+) Found: 278.0579. Calc. for C17H10O4: 278.0579.

**6-Methoxy-Benzo[B]naphtho[2,3-d]furan-6,11-dione. 1c:** From **2c** (2.60 g, 5.6 mmoles) ;yield: (0.89 g, 57%); yellow solid, m.p. 195o C (ethylacetate/chloroform); IR *v*max/cm-1 1698, 1670 cm-1 (C=O) (KBr); 1H NMR (CDCl3,300MHz) **H8.3 (m, 2H, H1 and H4), 7.9 (d, *J* 9.0 Hz, 1H, H8), 7.8 (m, 2H, H2 and H3), 7.4 (t, *J* 9.0 Hz, 1H, H5), 7.0 (d, 1H, H7), 4.1 (s, 3H, OC**H3**); 13C NMR (50 MHz, CDCl3) **C143.5, 134.5, 134.3, 132.5, 128.4, 127.3, 127.2, 121.0, 120.6, 119.8, 114.05, 104.37, 100.1, 98.6, 56.4 (O**C**H3); HRMS (M+) Found: 278.0572.Calc. for C17H10O4: 278.0579.

**3-(4,6-Dimethoxy-benzofuran-2-yl)-3H-isobenzofuran-1-one 9:** From **2d** (2.77g, 5.6 mmoles); yield: (1.11 g, 64%); yellow solid, m.p. 170o C (ethylacetate/chloroform) ; IR *v*max/cm-1 1770 cm-1 (C=O) (KBr); 1H NMR (CDCl3,300MHz) **H 7.9–7.5 (m, 5H), 6.6 (s, 1H, C**H**OR), 6.6 (d, *J* 9.0 Hz, 1H, H5), 6.3 (s, 1H, H7), 3.9 (s, 6H, OC**H3**); 13C NMR (50 MHz, CDCl3) **C158.6, 156.7, 154.9, 153.7, 137.8, 133.4, 130.0, 128.9, 127.9, 123.2, 121.8, 121.5, 112.4, 106.7, 96.5, 71.3 (**C**HOR), 56.1 (O**C**H3) HRMS (M+) Found: 310.0997. Calc. for C18H14O5: 310.0842.
